# Supplementary material for: Behavioral Strategies to Mitigate Violent Behavior Among Inpatients: A Literature Review
Source: Atypon-hosted journal article supplement (doi:10.1176/appi.ps.201400395), 2015-05-01
Supplement: appi.ps.201400395.ds001.pdf [file appi.ps.201400395.ds001.pdf]

**Supplemental Table 1: Behavioral interventions to reduce violent behavior among people with mental illness**

| Citation                                                                                        | Study Design & Participants                                                                                                                                                                                                                                                                              | Behavioral Interventions                                                                                                                                                 | Findings                                                                                                                                                                                                                            |
|-------------------------------------------------------------------------------------------------|----------------------------------------------------------------------------------------------------------------------------------------------------------------------------------------------------------------------------------------------------------------------------------------------------------|--------------------------------------------------------------------------------------------------------------------------------------------------------------------------|-------------------------------------------------------------------------------------------------------------------------------------------------------------------------------------------------------------------------------------|
| <b>Experimental Studies</b>                                                                     |                                                                                                                                                                                                                                                                                                          |                                                                                                                                                                          |                                                                                                                                                                                                                                     |
| Cullen, <i>et al. Journal of Consulting and Clinical Psychology</i> 80: 1114-1120, 2012.        | Randomized controlled trial of non-actively psychotic inpatients with a primary psychotic disorder and a history of violence                                                                                                                                                                             | Reasoning and Rehabilitation program, which uses cognitive skills training that focuses on problem-solving vs. treatment as usual                                        | Effective in reducing measures of verbal aggression during treatment period and 12 months later; half of the participants dropped out of the treatment group.                                                                       |
| Haddock, <i>et al. British Journal of Psychiatry</i> 194: 152-157, 2009.                        | Randomized controlled trial of a mixed inpatient/outpatient population with a diagnosis of schizophrenia or schizoaffective disorder and a history of violent behavior                                                                                                                                   | CBT intervention that included strategies to increase engagement, reduce impact of psychotic symptoms, and reduce anger vs. social activity therapy for a 6-month period | CBT intervention showed greater efficacy in reducing violent/aggressive incidents during the treatment and follow-up period when compared to social anxiety therapy                                                                 |
| Smith, <i>et al. Psychiatric Rehabilitation Journal</i> 33: 207-218, 2010.                      | Observational study of predominantly male participants with a history of dual diagnosis and not guilty by reason of insanity (NGRI) status (crimes included murder, manslaughter, violent assault, and aggression) who were discharged from a state forensic hospital to a residential treatment program | Arkansas Partnership Program which provided rehabilitative programs with decreasing restrictions as patients improve                                                     | Almost all participants had no re-arrests during 7-year follow-up period                                                                                                                                                            |
| <b>Review Articles</b>                                                                          |                                                                                                                                                                                                                                                                                                          |                                                                                                                                                                          |                                                                                                                                                                                                                                     |
| Ball. <i>Psychiatric Quarterly</i> 64: 359-369, 1993.                                           | Focuses on behavioral techniques used in inpatient and community settings                                                                                                                                                                                                                                | Reviewed behavioral strategies                                                                                                                                           | Emphasized importance of behavioral analysis prior to determining intervention. Described various interventions including environmental changes, relaxation, and social skills training                                             |
| Buckley, <i>et al. Psychiatric Clinics of North America</i> 26: 231-272, 2003.                  | Focuses on patients with schizophrenia who are violent in a variety of settings including inpatient, emergency room, and community settings                                                                                                                                                              | Reviewed psychopharmacologic and behavioral interventions                                                                                                                | Emphasized importance of creating a behavioral plan. Recommended use of seclusion and restraint as treatment of last resort                                                                                                         |
| Corrigan, <i>et al. Hospital and Community Psychiatry</i> 44: 125-133, 1993.                    | Describes interventions targeting psychiatric inpatients                                                                                                                                                                                                                                                 | Reviewed psychopharmacologic and behavioral interventions                                                                                                                | Inpatient techniques such as a token economy and decelerative techniques were recommended.                                                                                                                                          |
| Harris and Rice. <i>Psychiatric Services</i> 48: 1168-1176, 1997.                               | Targets patients (including severely mentally ill) with a history of violence in inpatient and outpatient settings                                                                                                                                                                                       | Reviewed methods for violent risk assessment and management                                                                                                              | Emphasized importance of improving various levels of control ( <i>e.g.</i> , situational, interpersonal). Despite lack of well-controlled studies, described empiric support for contingency management and behavioral modification |
| Littrell and Littrell. <i>Journal of Psychosocial Nursing</i> 36: 18-24, 1998.                  | Provides recommendations for a nursing audience who work with patients (including the severely mentally ill) in both inpatient and community settings                                                                                                                                                    | Provided conceptual framework and guidelines for psychiatric nursing staff                                                                                               | Encouraged general principles for violence management (direct communication, reducing sensory deficits, forming a patient-specific treatment plan, strength-based focus)                                                            |
| Muralidharan and Fenton. <i>Cochrane Database of Systematic Reviews</i> : 1-17, 2012.           | Describes behavioral interventions for patients with serious mental illness on acute inpatient units                                                                                                                                                                                                     | Reviewed containment strategies                                                                                                                                          | No definitive conclusions about containment strategies due to lack of randomized controlled trials                                                                                                                                  |
| Robinson, <i>et al. Journal of the American Psychiatric Nurses Association</i> 5: S9-S16, 1999. | Focuses on managing patients with schizophrenia in inpatient and outpatient settings                                                                                                                                                                                                                     | Reviewed psychosocial methods for managing aggressive behavior                                                                                                           | Encouraged verbal de-escalation and optimizing physical environment prior to restraint                                                                                                                                              |
| Rocca, <i>et al. Progress in Neuro-</i>                                                         | Discusses interventions in inpatient and other psychiatric                                                                                                                                                                                                                                               | Reviewed both risk assessment, and clinical management                                                                                                                   | Emphasized importance of starting with least coercive measures ( <i>e.g.</i> , verbal                                                                                                                                               |

|                                                                                       |                                                                                                                                                                                   |                                                                   |                                                                                                                                                                                                                                        |
|---------------------------------------------------------------------------------------|-----------------------------------------------------------------------------------------------------------------------------------------------------------------------------------|-------------------------------------------------------------------|----------------------------------------------------------------------------------------------------------------------------------------------------------------------------------------------------------------------------------------|
| <i>Psychopharmacology and Biological Psychiatry</i> 30: 586-598, 2006.                | emergency settings                                                                                                                                                                | (pharmacologic vs. behavioral)                                    | interventions) before increasing intervention intensity (e.g., show of force)                                                                                                                                                          |
| Volavka. <i>Psychiatria Danubina</i> 25: 24-33, 2013.                                 | Describes inpatient and community treatment interventions for violence in patients with schizophrenia or bipolar disorder                                                         | Reviews epidemiology and interventions to target violent behavior | Evidence that CBT that target factors that increase aggression risk in bipolar disorder (ex. treatment non-adherence) can be effective; also describe CBT intervention targeting schizophrenic patients that have reduced arrest rates |
| Wong <i>et al.</i> <i>The Psychiatric Clinics of North America</i> 11: 569-580, 1998. | Examines interventions for patients (including those with a history of serious mental illness) with a history of violence in settings such as hospital wards or residential units | Reviewed behavioral treatment                                     | Classification of interventions methods as either acceleration (e.g., token economies, social skills training) or deceleration (e.g., social extinction, time out).                                                                    |
